# Supplementary material for: Volatile, Microbial, and Sensory Profiles and Consumer Acceptance of Coffee Cascara Kombuchas
Source: MDPI journal article supplement (doi:10.3390/foods12142710), 2023-07-15
Supplement: s1 [file s1]

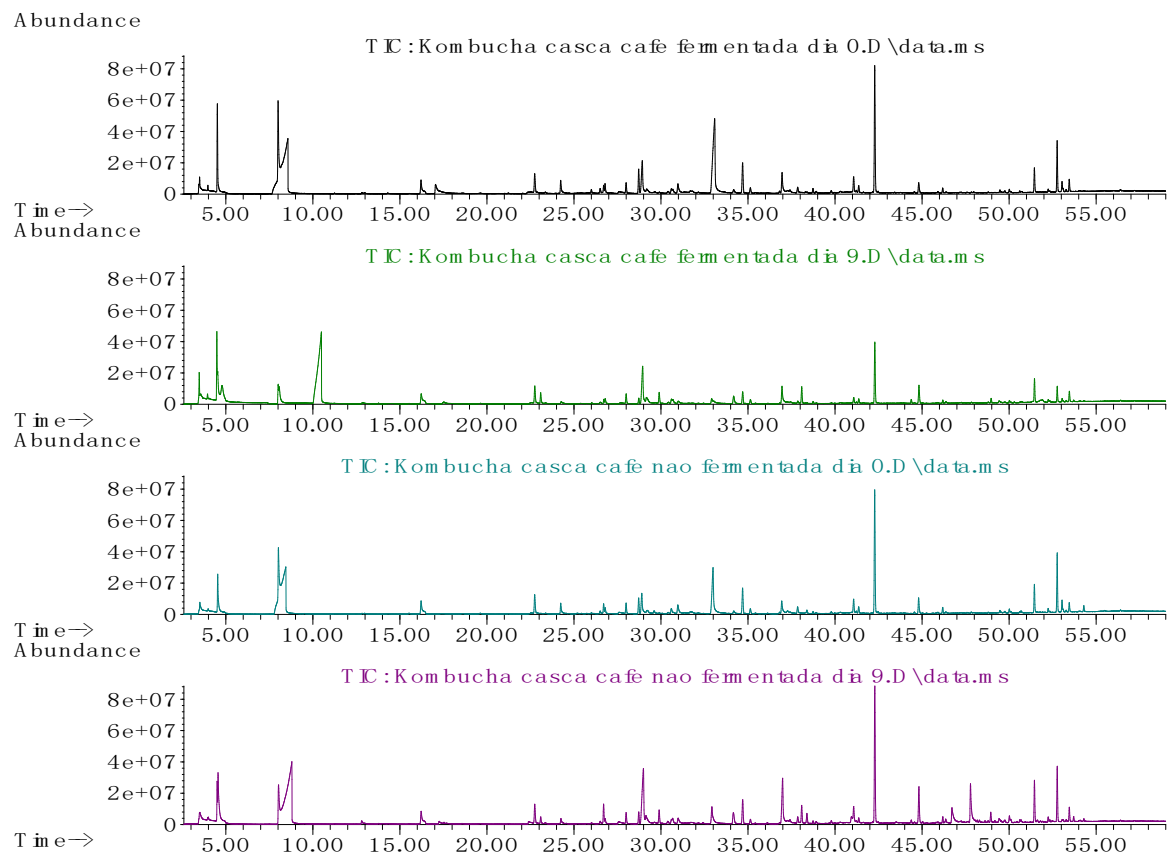

**Figure S1.** Total Ion Chromatograms (TIC) of kombuchas obtained by SPME/GC/MS

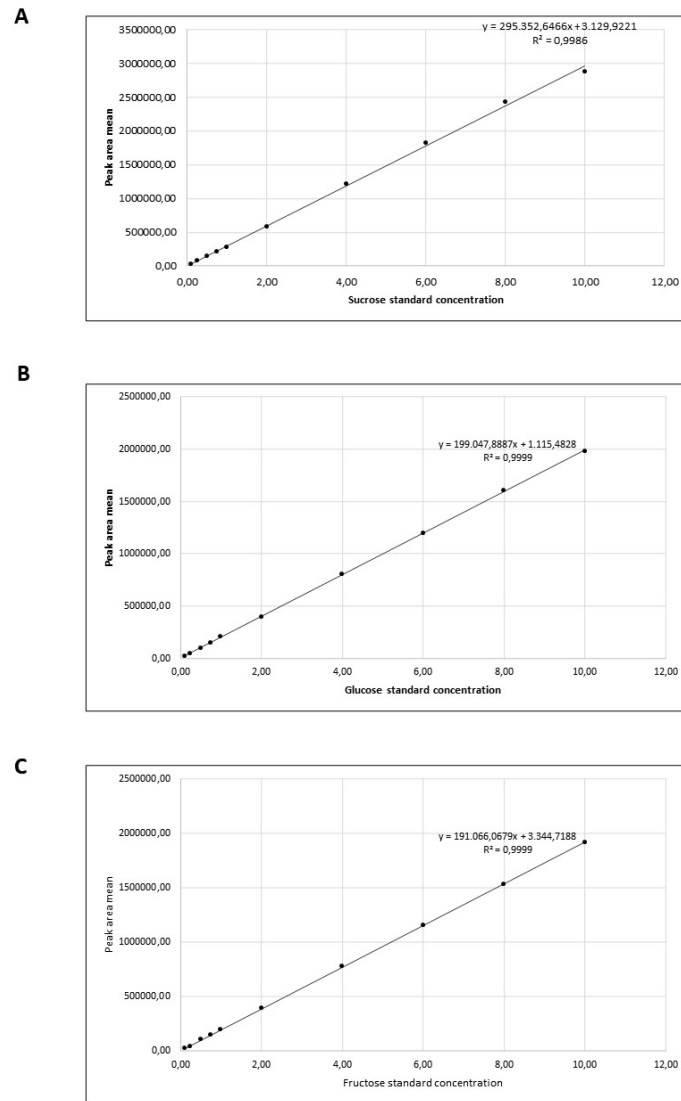

**Figure S2.** Calibration curves of sucrose (A), glucose (B) and fructose (C) standards used for sugars analysis by High Performance Liquid Chromatography Refractive Index Detector system.
